# Supplementary material for: Bacterial Membrane Vesicles as a Novel Strategy for Extrusion of Antimicrobial Bismuth Drug in Helicobacter pylori
Source: PubMed Central journal article supplement (PMC9601102; doi:10.1128/mbio.01633-22), 2022-09-26

Figure S2

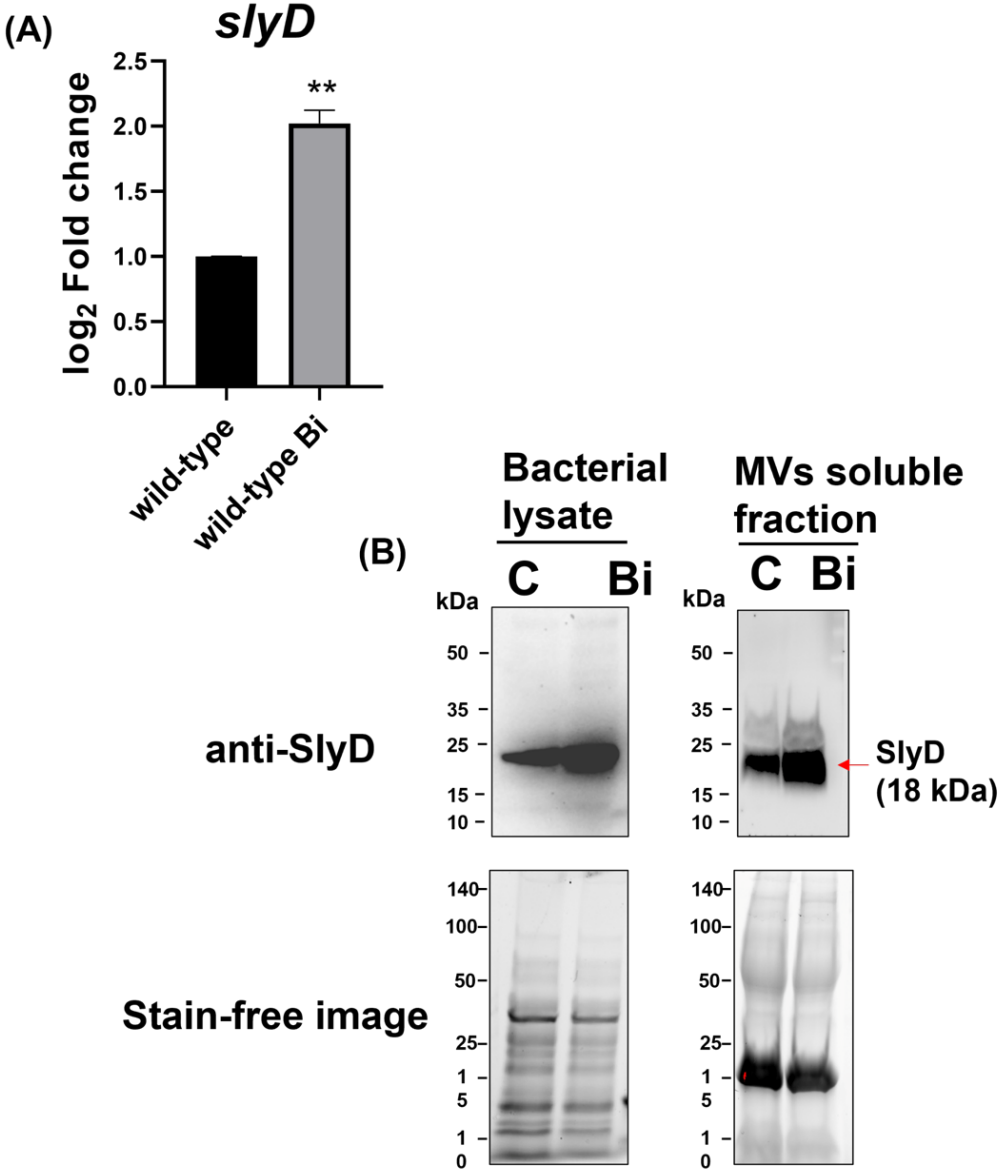

Supplement: mbio.01633-22-s0002.pdf [file mbio.01633-22-s0002.pdf]
